# Supplementary material
Source: Springer Nature journal article supplement (https://www.springermedizin.de/resource/supplementary/13054_2010_8639_MOESM6_ESM.pdf/9732436)

## A. Lung

## B. Liver

## C. Gut

## D. Kidney

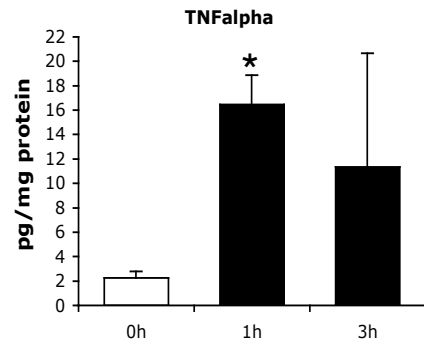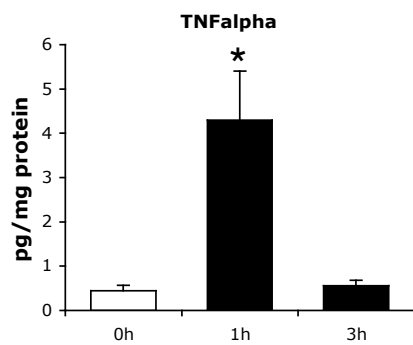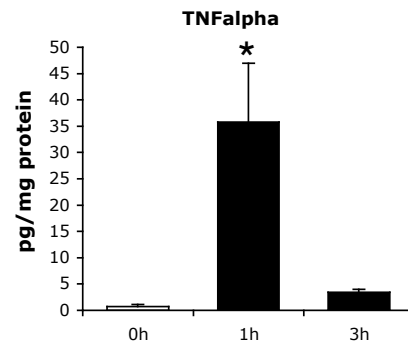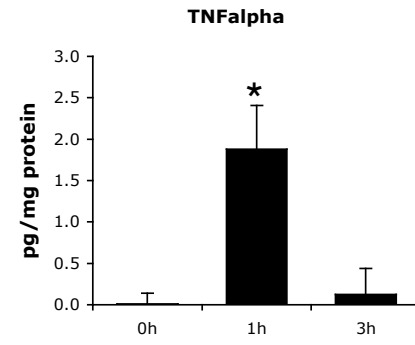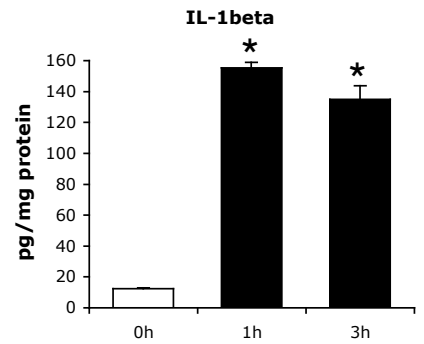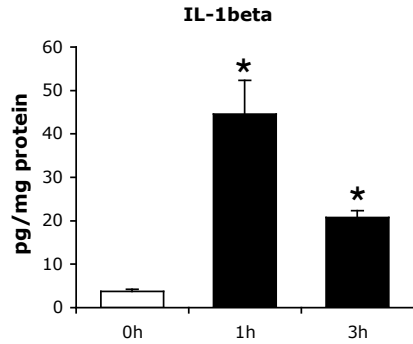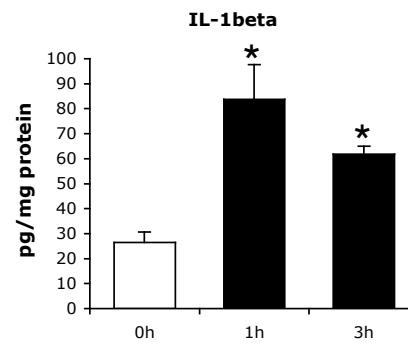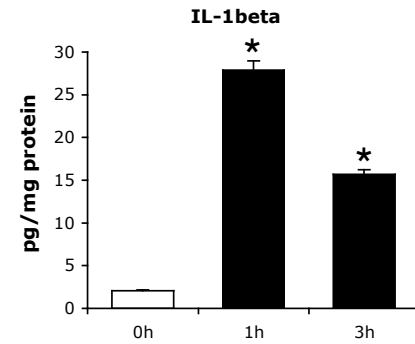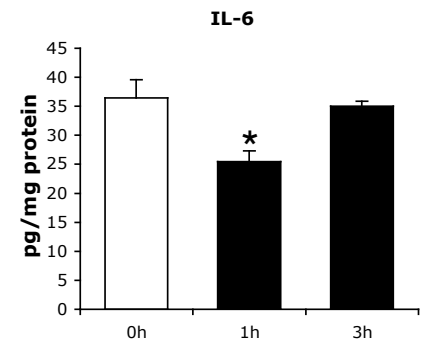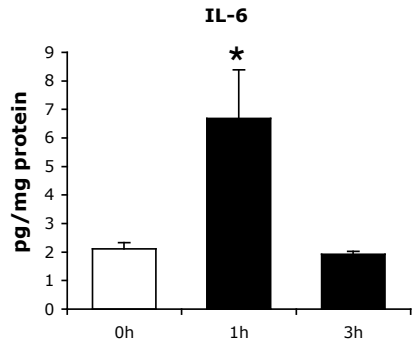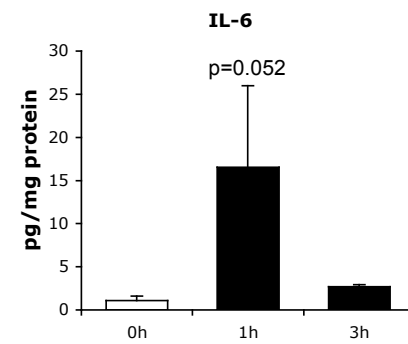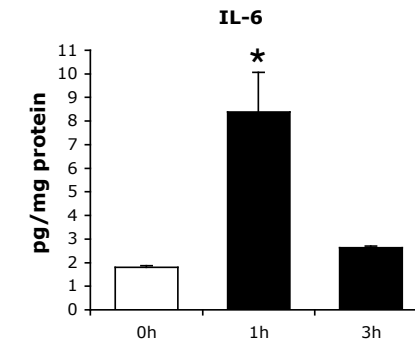

Supplement: MOESM6 [file 9732436]
